# Supplementary material
Source: PubMed Central journal article supplement (PMC8054936)
Supplement: TBSD_A_1911857_SM8633.pdf [file TBSD_A_1911857_SM8633.pdf]

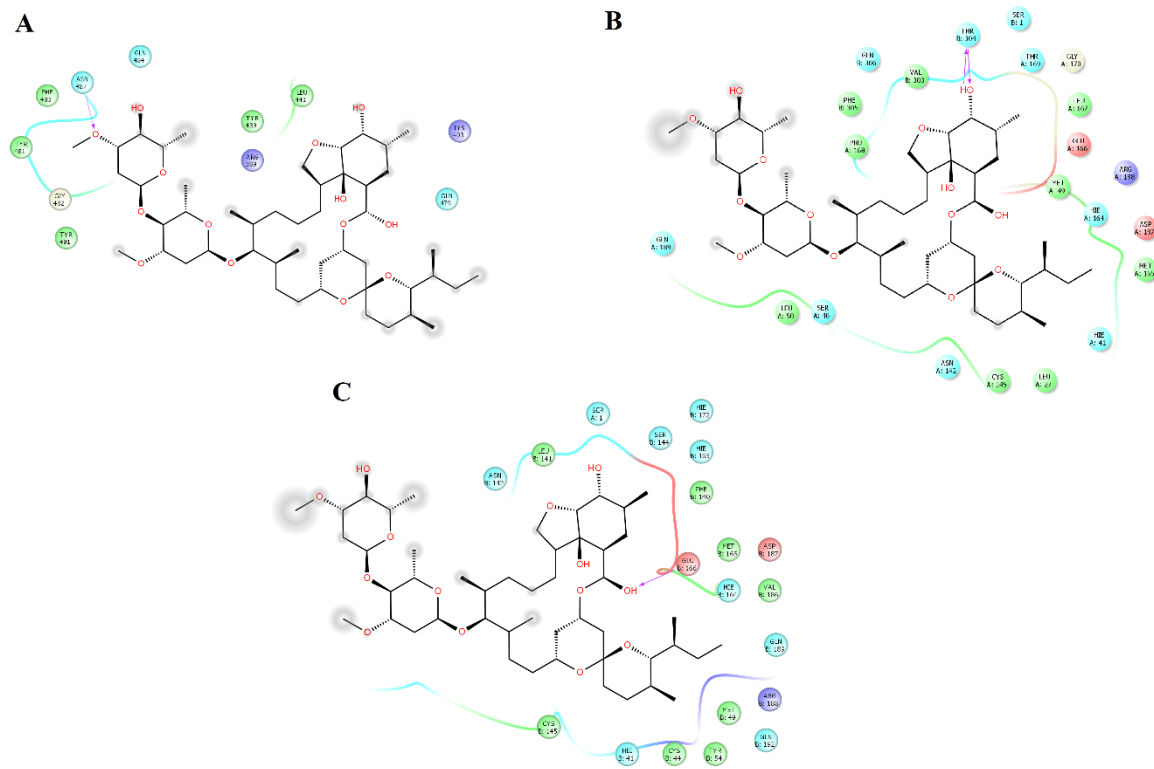

**Figure 2.** Docked complexes between ivermectin and RBD of spike protein and 3CL<sup>pro</sup> of SARS-CoV-2. Interaction of ivermectin with RBD-spike protein (A). Interaction of ivermectin with subunit 1 of 3CL<sup>pro</sup> (B), and subunit 2 of 3CL<sup>pro</sup> (C).

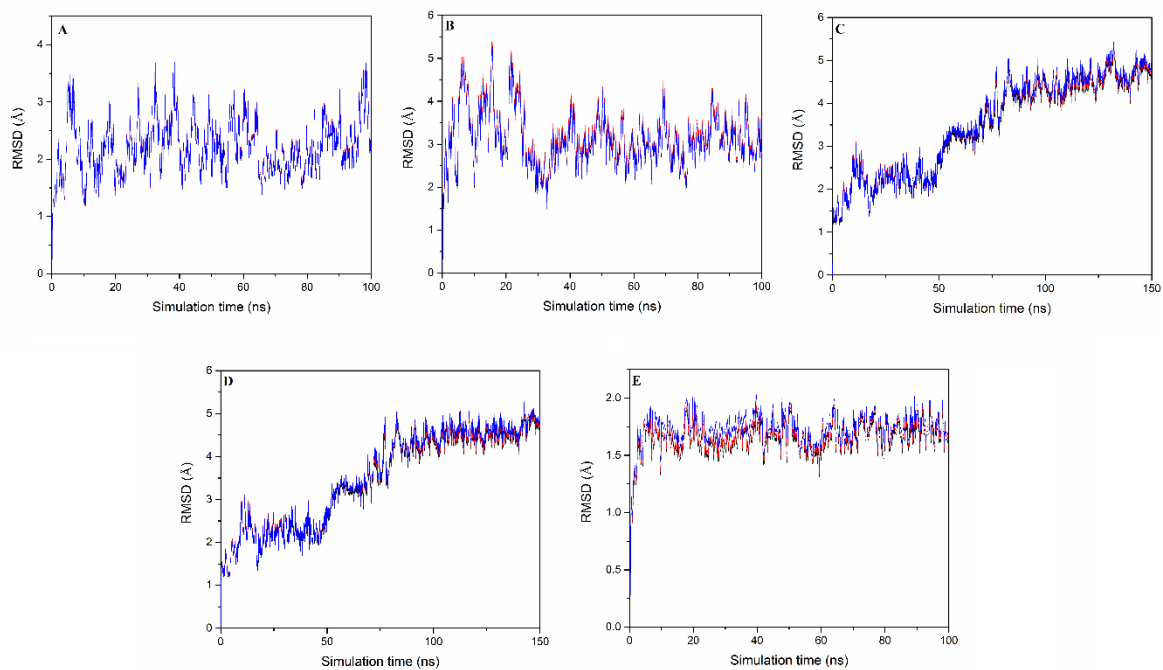

**Figure 3.** Root mean squared deviation (RMSD) values of Importin- $\alpha$ -IVM, Nsp9-IVM, RdRp-IVM, spike-protein-IVM, and 3CL<sup>pro</sup>-IVM systems through MD simulations. A) Importin- $\alpha$ -IVM, B) Nsp9-IVM, C) RdRp-IVM, D) RBD-spike-IVM, and E) 3CL<sup>pro</sup>-IVM complexes. Triplicate simulations are in black, blue, and red lines.

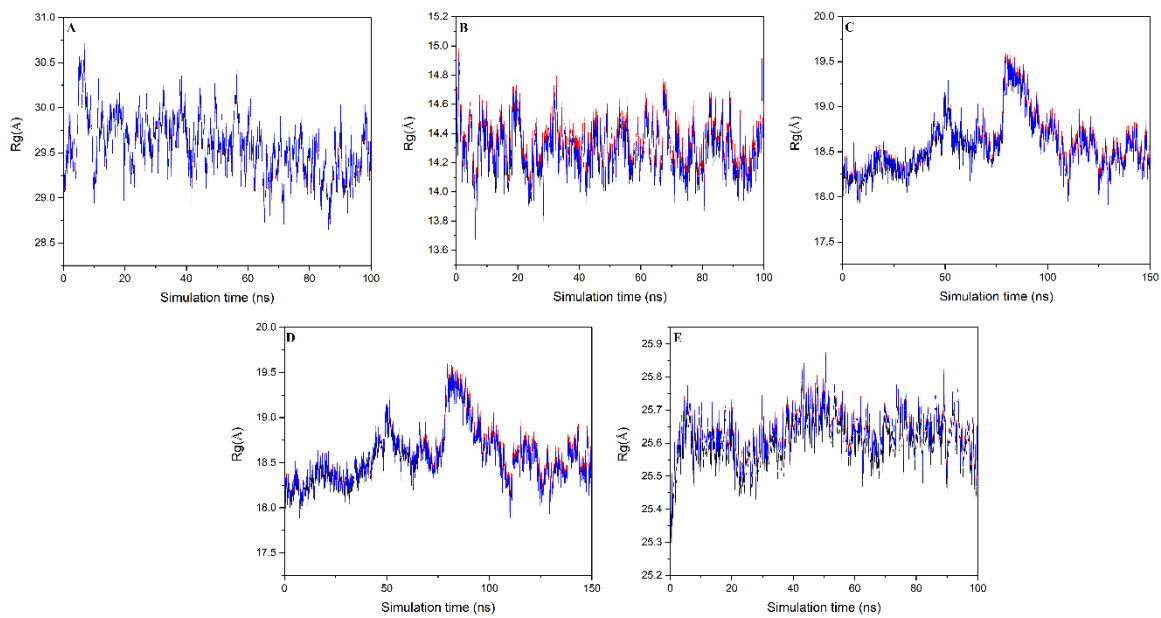

**Figure 4.** The radius of gyration (Rg) values of Importin- $\alpha$ -IVM, Nsp9-IVM, RdRp-IVM, spike-protein-IVM, and 3CL<sup>pro</sup>-IVM systems through MD simulations. A) Importin- $\alpha$ -IVM, B) Nsp9-IVM, C) RdRp-IVM, D) RBD-spike-IVM, and E) 3CL<sup>pro</sup>-IVM complexes. Triplicate simulations are in black, blue, and red lines.

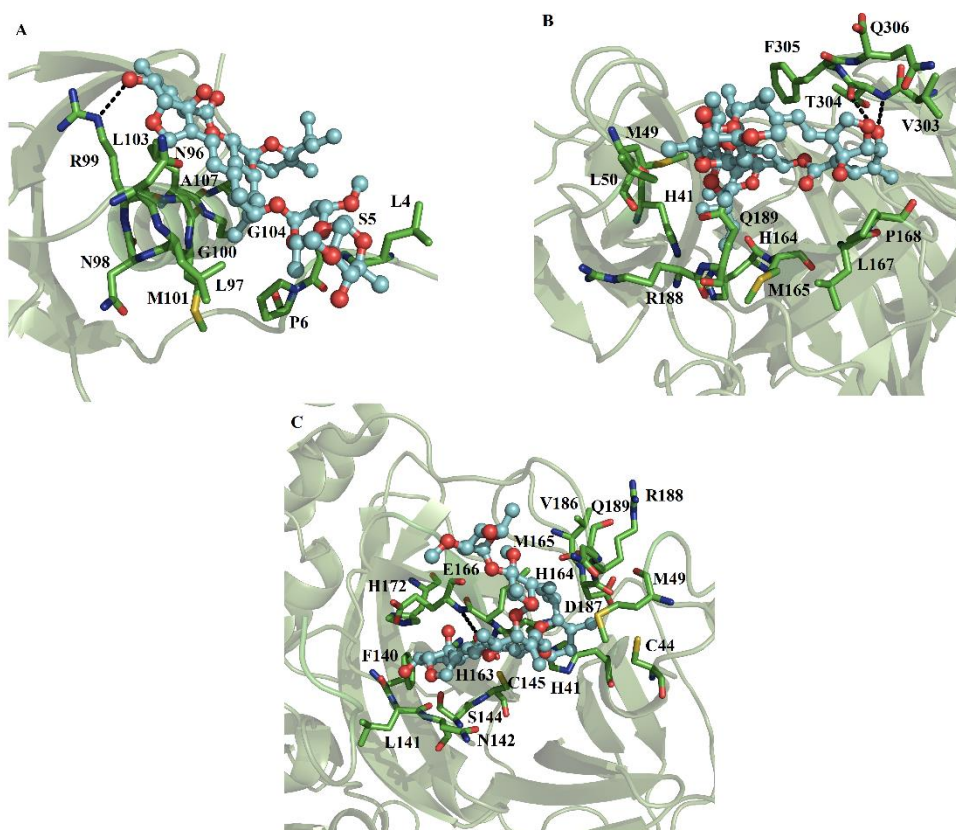

**Figure 5.** Complexes between ivermectin with Nsp9 replicase and 3CL<sup>pro</sup> of SARS-CoV-2 through MD simulations. Interaction of ivermectin with Nsp9 replicase (A). Interaction of ivermectin with subunit 1 of 3CL<sup>pro</sup> (B) and subunit 2 of 3CL<sup>pro</sup> (C).
